# Supplementary material for: Prospective associations and population impact of sweet beverage intake and type 2 diabetes, and effects of substitutions with alternative beverages
Source: PubMed Central journal article supplement (PMC4473082; doi:10.1007/s00125-015-3572-1), 2015-05-06
Supplement: 125_2015_3572_MOESM3_ESM.pdf [file 125_2015_3572_MOESM3_ESM.pdf]

ESM **Table 3.** The effect of substituting a serving of non-sugar sweetened beverages for sweet beverages on incident type 2 diabetes, without adjustment for energy intake: the EPIC-Norfolk Study ( $n=24653$ )

|                                        | Hazard ratio (95% confidence interval) for the effect of substituting <sup>a</sup> a serving of: |                            |                                       |
|----------------------------------------|--------------------------------------------------------------------------------------------------|----------------------------|---------------------------------------|
|                                        | Artificially-sweetened beverages<br>(336g/d)                                                     | Drinking water<br>(280g/d) | Unsweetened tea or coffee<br>(280g/d) |
| Adjusted model <sup>b</sup>            |                                                                                                  |                            |                                       |
| Soft drinks (336g)                     | 0.95 (0.76,1.13)                                                                                 | 0.87 (0.74,0.99)           | 0.87 (0.75,0.99)                      |
| Sweetened tea or coffee (280g)         | 1.04 (0.90,1.18)                                                                                 | 1.00 (0.92,1.08)           | 0.96 (0.93,1.00)                      |
| Sweetened milk beverages (280g)        | 0.85 (0.68,1.02)                                                                                 | 0.82 (0.68,0.96)           | 0.77 (0.65,0.88)                      |
| Artificially-sweetened beverage (336g) | n/a                                                                                              | 0.97 (0.82,1.12)           | 0.90 (0.77,1.03)                      |
| Fruit juice (150g)                     | 1.02 (0.82,1.20)                                                                                 | 0.98 (0.83,1.14)           | 0.91 (0.79,1.04)                      |

<sup>a</sup> Estimates for the effect of substitution were calculated by including both beverages (the sweet beverage and the non-caloric replacement beverage) in a model as continuous variables. The difference in the coefficients was used to calculate the hazard ratio and 95% confidence interval for the substitution effect.

<sup>b</sup> Adjusted for age, sex, social class (professional, managerial, skilled, semi-skilled, unskilled), education level (no qualification, O level, A level, degree, higher), family history of diabetes (no, yes), physical activity level (active, moderately active, moderately inactive, inactive), smoking status (current, former, never), alcohol consumption, season (winter, summer), body mass index, waist circumference
