# Supplementary material for: Prospective associations and population impact of sweet beverage intake and type 2 diabetes, and effects of substitutions with alternative beverages
Source: Diabetologia. 2015 May 6;58(7):1474–83. doi: 10.1007/s00125-015-3572-1 (PMC4473082; doi:10.1007/s00125-015-3572-1)
Supplement: Supplementary file 1 — (PDF 47 kb) [file 125_2015_3572_MOESM1_ESM.pdf]

**ESM Table 1.** Sweet beverage consumption in the EPIC-Norfolk study (n=24653): beverage category descriptions, consumers, intakes and contribution to the weight of total beverage intake<sup>a</sup>

| Beverages                              | Description                                                                                                      | Consumers,<br>n (%) | Intakes in<br>consumers<br>only, g/d | Contribution<br>to total weight<br>of beverage<br>intake, % | Consumer of other sweet beverages, % |                     |                         |      |                |
|----------------------------------------|------------------------------------------------------------------------------------------------------------------|---------------------|--------------------------------------|-------------------------------------------------------------|--------------------------------------|---------------------|-------------------------|------|----------------|
|                                        |                                                                                                                  |                     |                                      |                                                             | Soft<br>drinks                       | Sweet<br>tea/coffee | Sweet milk<br>beverages | ASB  | Fruit<br>juice |
| Sugar-sweetened beverages              |                                                                                                                  |                     |                                      |                                                             |                                      |                     |                         |      |                |
| Soft drinks                            | Soft drinks, sports/energy drinks and squashes sweetened with sugar and juice based beverages                    | 12810 (52)          | 83<br>(41,176) <sup>b</sup>          | 5 (2,11) <sup>b</sup>                                       | 100                                  | 53.5                | 31.9                    | 23.6 | 52             |
| Sweetened tea/coffee                   | Instant and filtered, caffeinated and decaffeinated tea and coffee where table sugar has been added <sup>c</sup> | 12344 (50)          | 516<br>(147,1074)                    | 33 (9,72)                                                   | 55.5                                 | 100                 | 31.2                    | 17.6 | 43.5           |
| Sweetened-milk beverages               | Milk shakes, flavoured milks, hot chocolates and other hot and cold sweetened-milk based beverages               | 7428 (30)           | 157<br>(56,257)                      | 9 (4,15)                                                    | 55.0                                 | 51.8                | 100                     | 23.7 | 48.4           |
| Artificially-sweetened beverages (ASB) | Diet/sugar-free soft drinks, sports/energy drinks and squashes                                                   | 5587 (23)           | 98<br>(47,217)                       | 6 (3,13)                                                    | 54.1                                 | 38.8                | 31.5                    | 100  | 49.7           |
| Fruit juice                            | 100% fruit juice and nectars <sup>d</sup>                                                                        | 11199 (45)          | 75<br>(35,148)                       | 4 (2,9)                                                     | 59.5                                 | 47.9                | 32.1                    | 24.8 | 100            |

<sup>a</sup>Total beverages include all sweet beverages listed above, water, unsweetened tea or coffee, stock based drinks (e.g. Bovril) and all alcoholic beverages. Milk was not included as milk consumed as a beverage could not be differentiated from milk consumed as a food e.g. with cereal.

<sup>b</sup>Median (IQR, inter-quartile range), all such values.

<sup>c</sup>Tea or coffee sweetened with artificial sweeteners and/or alternative sweeteners such as honey were not identified and were thus included as unsweetened tea or coffee.

<sup>d</sup>Includes juice recorded without further specification.
